# Supplementary material for: Electrospun porous LiNb3O8 nanofibers with enhanced lithium-storage properties
Source: Royal Society of Chemistry journal article supplement (doi:10.1039/c3ta13386a), 2013-01-01
Supplement: c3ta13386a.pdf [file c3ta13386a.pdf]

## *Supplementary Information*

### **Electrospun porous LiNb<sub>3</sub>O<sub>8</sub> nanofibers with enhanced lithium-storage properties**

Henghui Xu,<sup>a</sup> Jie Shu,<sup>b</sup> Xianluo Hu,<sup>\*a</sup> Yongming Sun,<sup>a</sup> Wei Luo,<sup>a</sup> and Yunhui Huang<sup>\*a</sup>

E-mail: huxl@mail.hust.edu.cn; huangyh@mail.hust.edu.cn

<sup>a</sup> *State Key Laboratory of Material Processing and Die & Mould Technology, School of Materials Science and Engineering, Huazhong University of Science and Technology, Wuhan 430074, P. R. China*

<sup>b</sup> *School of Materials Science and Chemical Engineering, Ningbo University, Ningbo 315211, P. R. China*

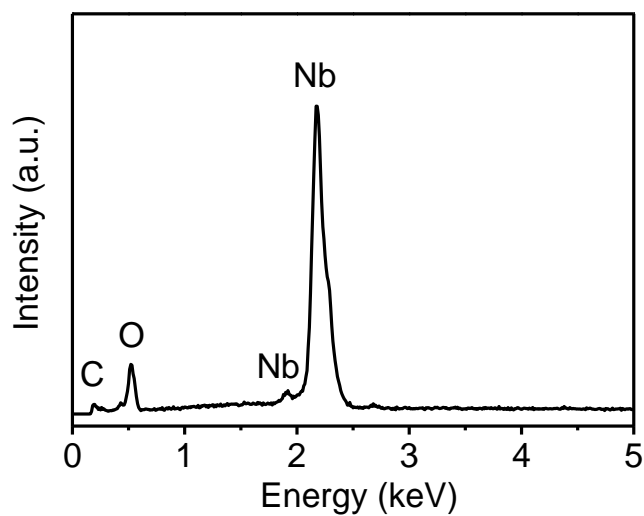

**Fig. S1** A typical EDX spectrum of  $\text{LiNb}_3\text{O}_8$ , suggesting the existence of Nb, O, and C, where the signal of C is generated from the conducting tape for the sample holder.

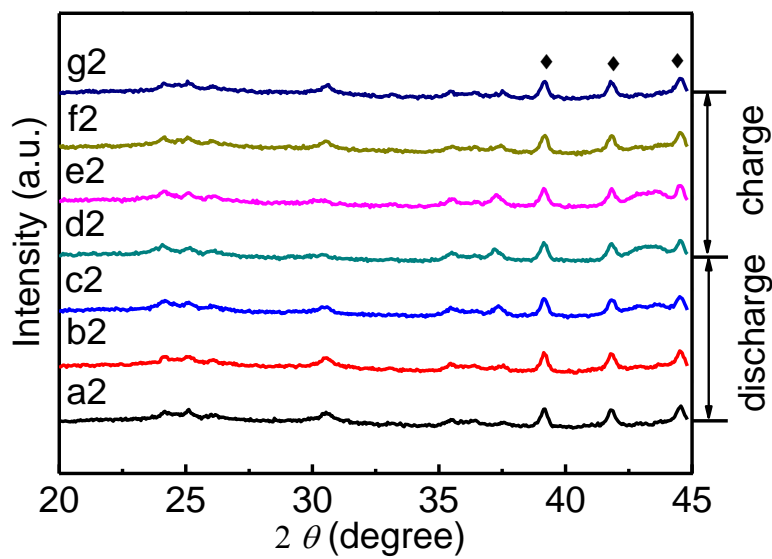

**Fig. S2** The in-situ XRD patterns in the range of 20–45° of  $\text{LiNb}_3\text{O}_8$  anode during the second cycle at  $30 \text{ mA g}^{-1}$  at specified points shown in Figure 8a.

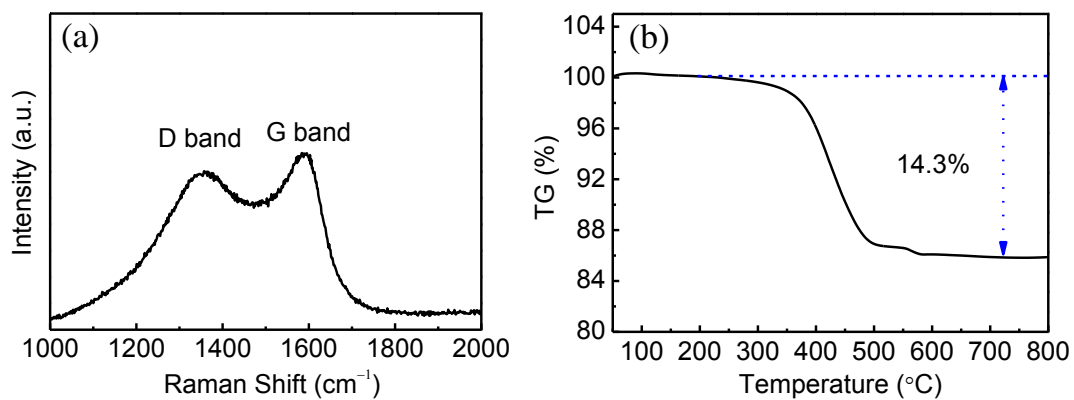

**Fig. S3** (a) Raman spectrum and (b) TG result of the LiNb<sub>3</sub>O<sub>8</sub>@C nanofibers measured at a heating rate of 10 °C min<sup>-1</sup> in a flowing air.

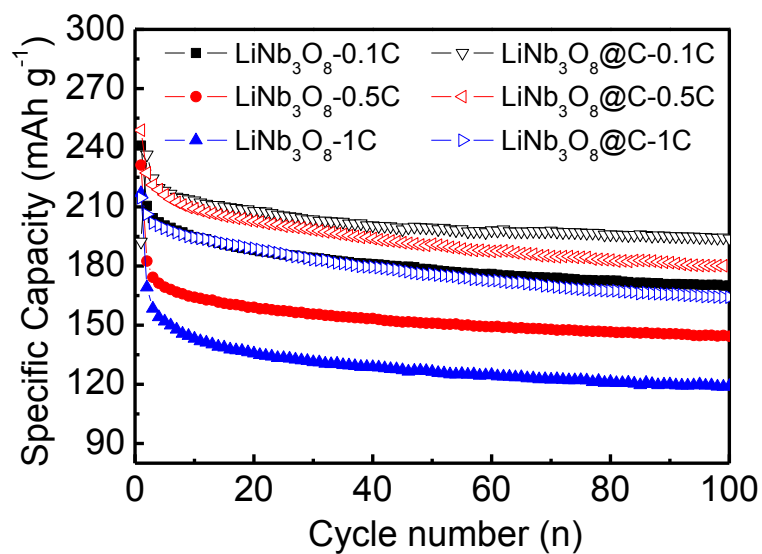

**Fig. S4** Comparison of the cycling stability at various C-rates for the carbon-free and coated LiNb<sub>3</sub>O<sub>8</sub> samples.
